# Supplementary material
Source: Royal Society of Chemistry journal article supplement (doi:10.1039/d6tc00740f)
Supplement: d6tc00740f1.pdf [file d6tc00740f1.pdf]

# Freeze-Drying Enabled Porous Layered $\delta$ -MnO<sub>2</sub>/rGO Composite Selected from MnO<sub>2</sub> Polymorphs for High-Performance AZIBs

Jiaoyuan Lu, Xiaojun Tang, Huiting Bi\*

*Hubei Key Laboratory for Clean Recycling and Resource Utilization of Waste Fibers,  
College of Chemistry and Chemical Engineering, Wuhan Textile University, Wuhan,  
430200, PR China.*

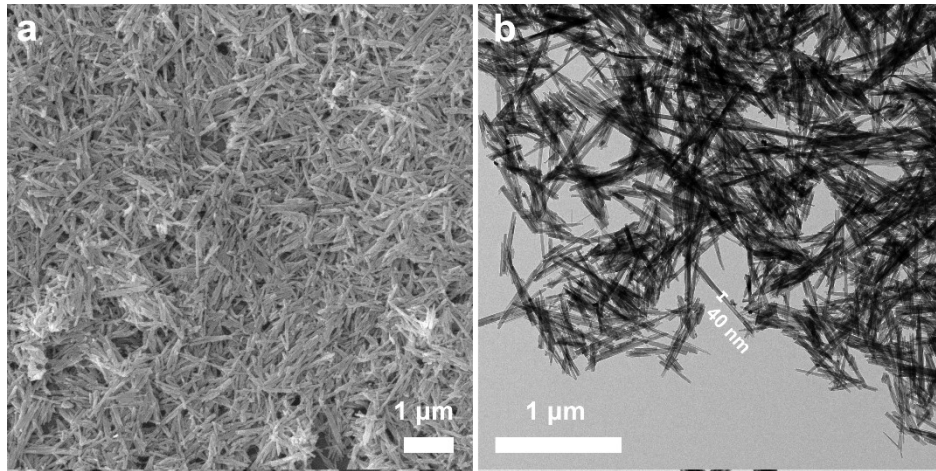

Fig. S1. Morphology and structure of  $\alpha$ -MnO<sub>2</sub>. (a) SEM image and (b) TEM image.

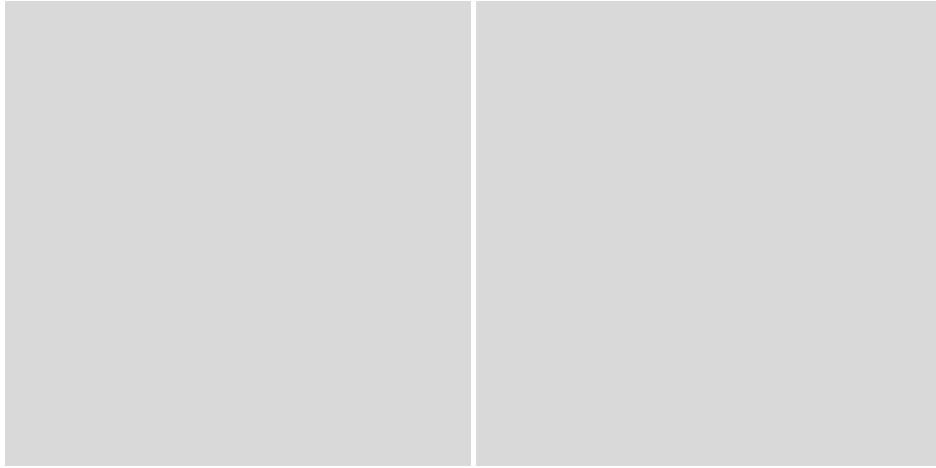

Fig. S2. Morphology and structure of  $\beta$ -MnO<sub>2</sub>. (a) SEM image and (b) TEM image.

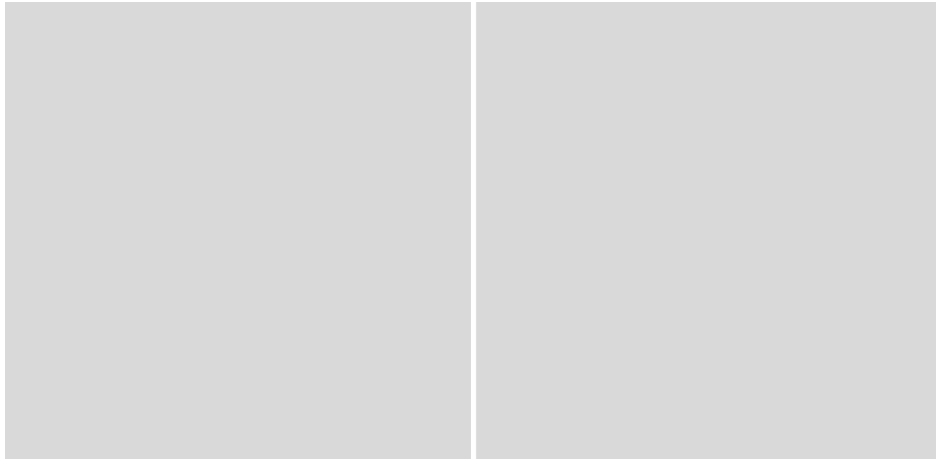

Fig. S3. Morphology and structure of  $\gamma$ -MnO<sub>2</sub>. (a) SEM image and (b) TEM image.

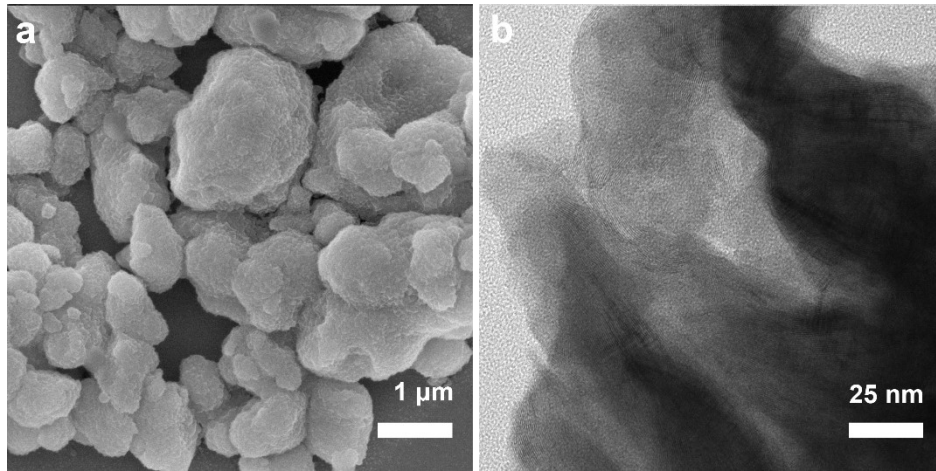

Fig. S4. Morphology and structure of  $\delta$ -MnO<sub>2</sub>. (a) SEM image and (b) TEM image.

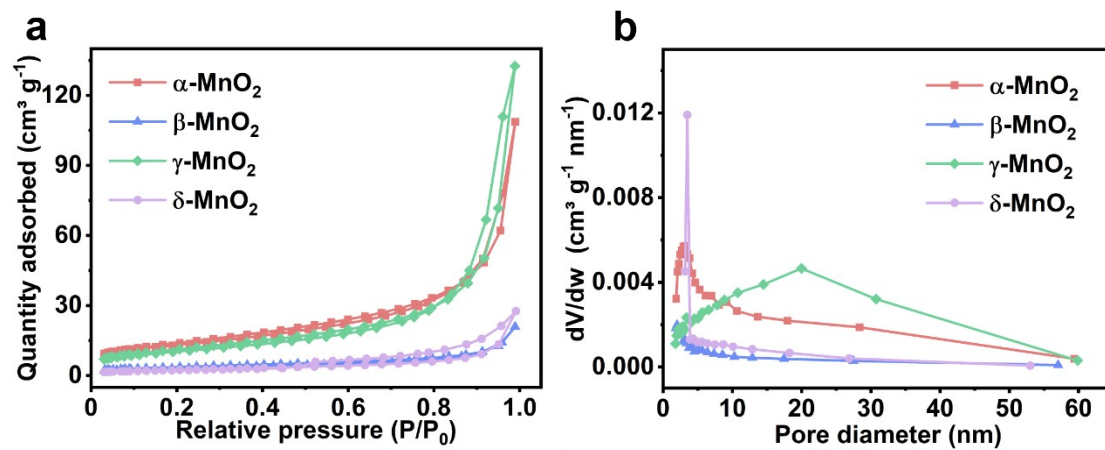

Fig. S5. (a) N<sub>2</sub> adsorption and desorption isotherms and (b) pore size distribution of MnO<sub>2</sub> polymorphs.

Table S1. BET analysis results of MnO<sub>2</sub> polymorphs.

|                                         | $\alpha$ -MnO <sub>2</sub> | $\beta$ -MnO <sub>2</sub> | $\gamma$ -MnO <sub>2</sub> | $\delta$ -MnO <sub>2</sub> |
|-----------------------------------------|----------------------------|---------------------------|----------------------------|----------------------------|
| BET surface area<br>(m <sup>2</sup> /g) | 50.32                      | 13.26                     | 41.29                      | 8.75                       |
| Pore Volume<br>(mL/g)                   | 0.16                       | 0.03                      | 0.20                       | 0.04                       |

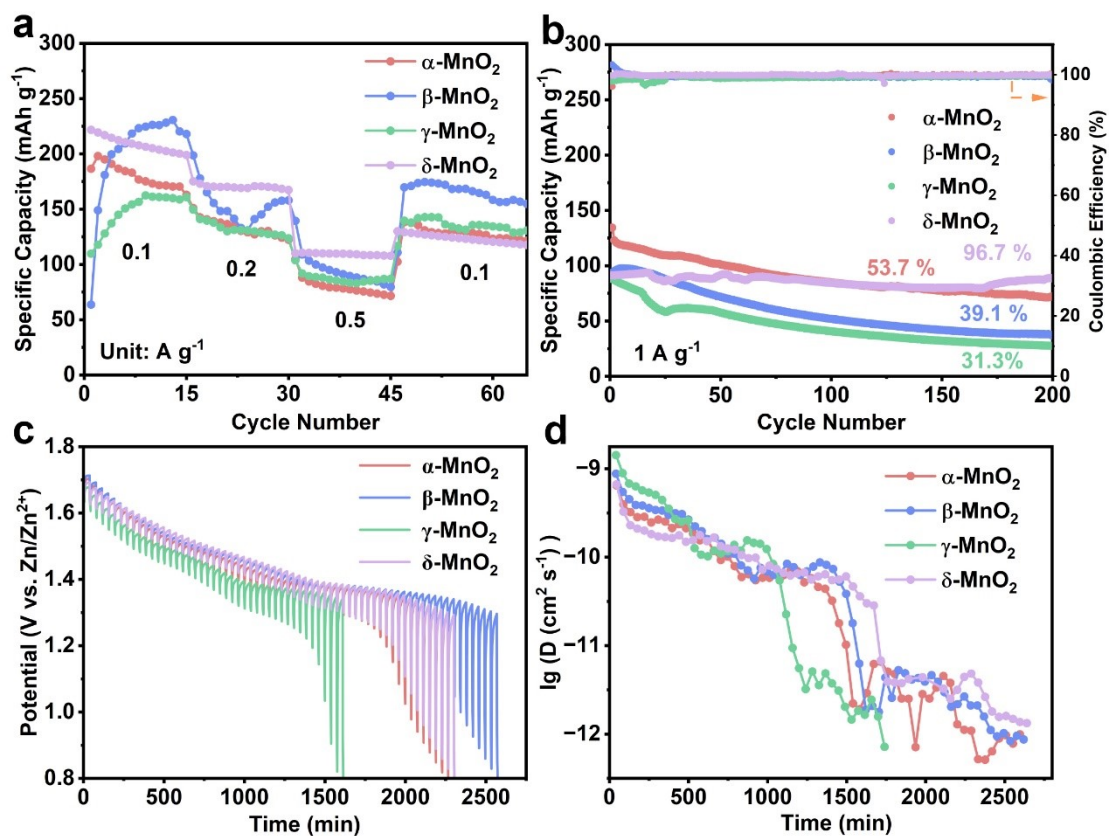

Fig. S6. Electrochemical performance and diffusion kinetics of MnO<sub>2</sub> polymorphs. (a) Rate performance. (b) Cycle performance at 1 A g<sup>-1</sup>. (c) GITT profile. (d) The diffusion coefficient  $\lg[D/(cm^2 s^{-1})]$  versus discharge time.

Table S2. The average apparent diffusion coefficients of H<sup>+</sup> and Zn<sup>2+</sup> diffusion in MnO<sub>2</sub> polymorphs.

| Average D<br>(10 <sup>-11</sup> cm <sup>2</sup> s <sup>-1</sup> ) | $\alpha$ -MnO <sub>2</sub> | $\beta$ -MnO <sub>2</sub> | $\gamma$ -MnO <sub>2</sub> | $\delta$ -MnO <sub>2</sub> |
|-------------------------------------------------------------------|----------------------------|---------------------------|----------------------------|----------------------------|
| H <sup>+</sup> diffusion                                          | 16.1                       | 24.8                      | 47.6                       | 18.9                       |
| Zn <sup>2+</sup> diffusion                                        | 0.24                       | 0.26                      | 0.17                       | 0.31                       |

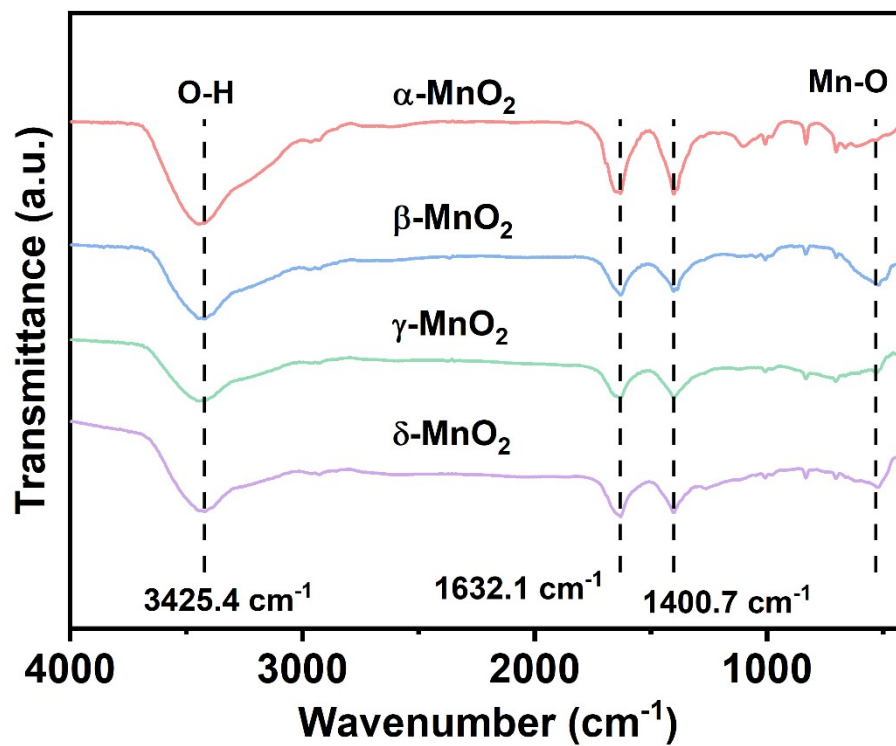

Fig. S7. FTIR of MnO<sub>2</sub> polymorphs.

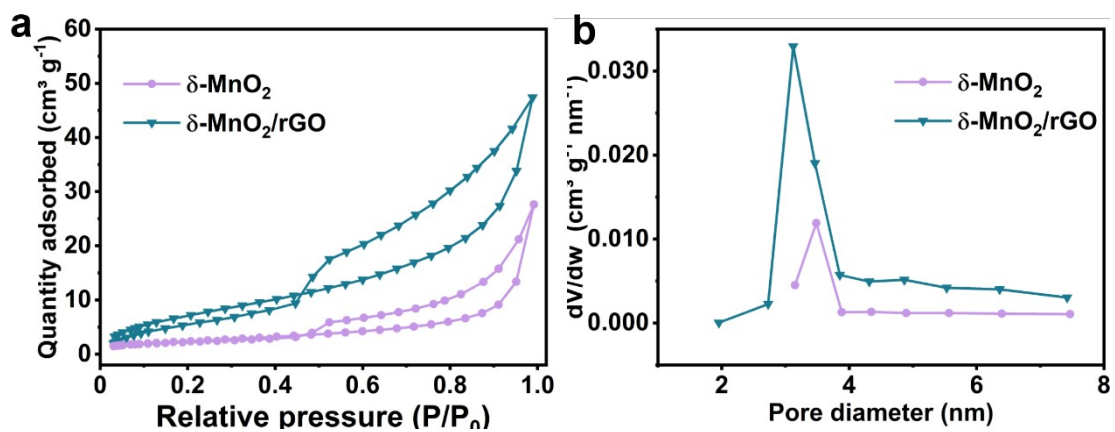

Fig. S8. (a)  $N_2$  adsorption and desorption isotherms and (b) pore size distribution of  $\delta-MnO_2$  and  $\delta-MnO_2/rGO$ .

Table S3. BET analysis results of  $\delta$ -MnO<sub>2</sub> and  $\delta$ -MnO<sub>2</sub>/rGO.

|                                         | $\delta$ -MnO <sub>2</sub> | $\delta$ -MnO <sub>2</sub> /rGO |
|-----------------------------------------|----------------------------|---------------------------------|
| BET surface area<br>(m <sup>2</sup> /g) | 8.75                       | 28.94                           |
| Pore Volume<br>(mL/g)                   | 0.04                       | 0.07                            |

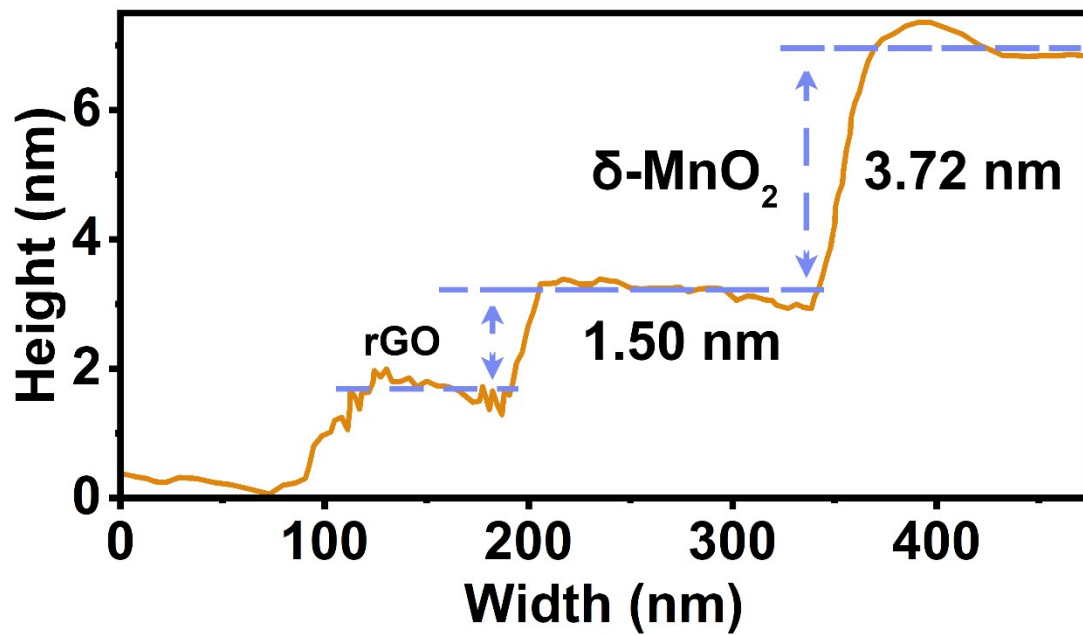

Fig. S9. Corresponding height profile of  $\delta$ -MnO<sub>2</sub>/rGO.

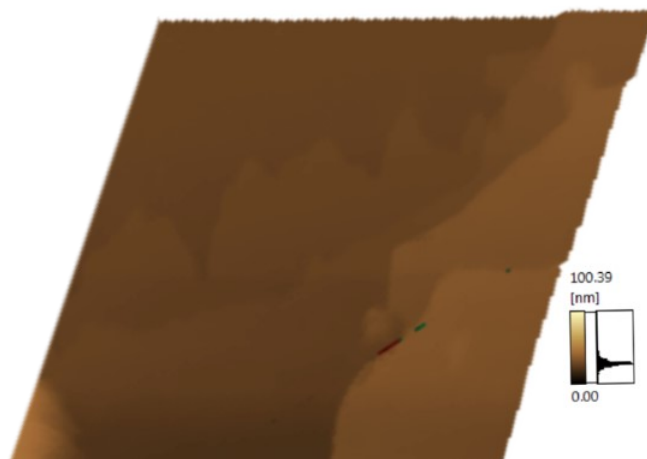

Fig. S10. 3D AFM image of  $\delta$ -MnO<sub>2</sub>/rGO

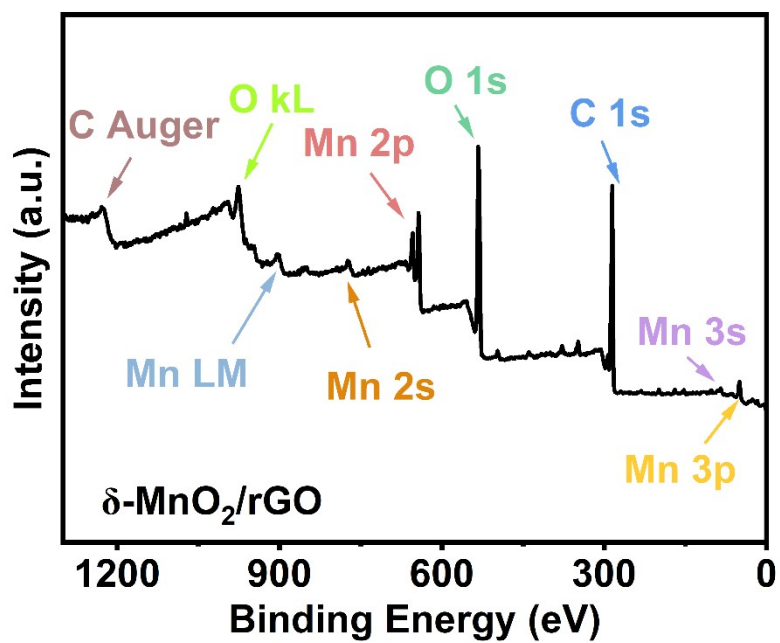

Fig. S11. XPS full spectrum of  $\delta\text{-MnO}_2/\text{rGO}$ .

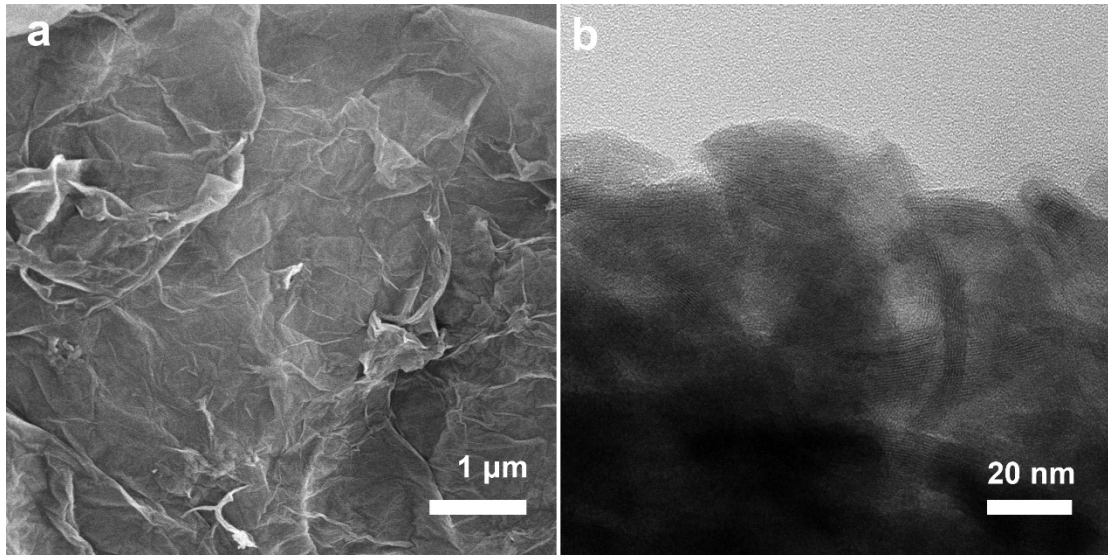

Fig. S12. (a) SEM image and (b) TEM image of  $\delta\text{-MnO}_2/\text{rGO}$ .

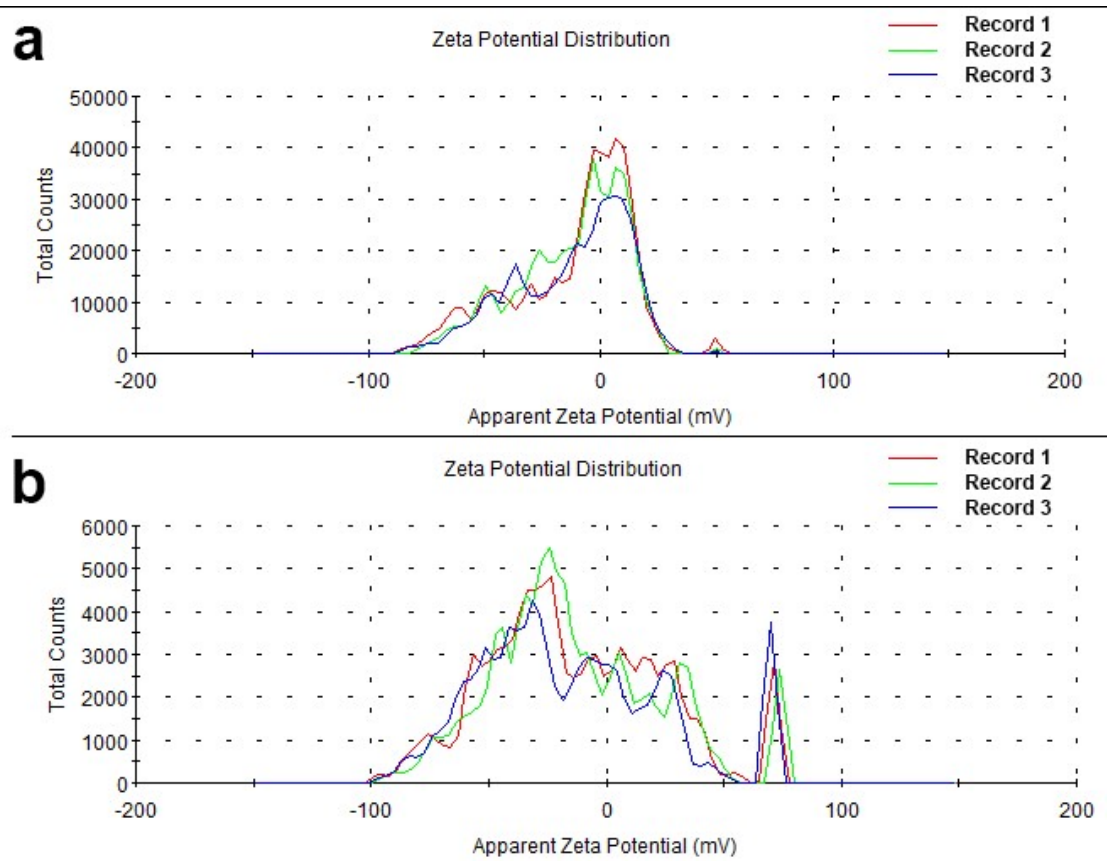

Fig. S13. Zeta Potential Distributions of (a)  $\delta$ -MnO<sub>2</sub> and (b) rGO.

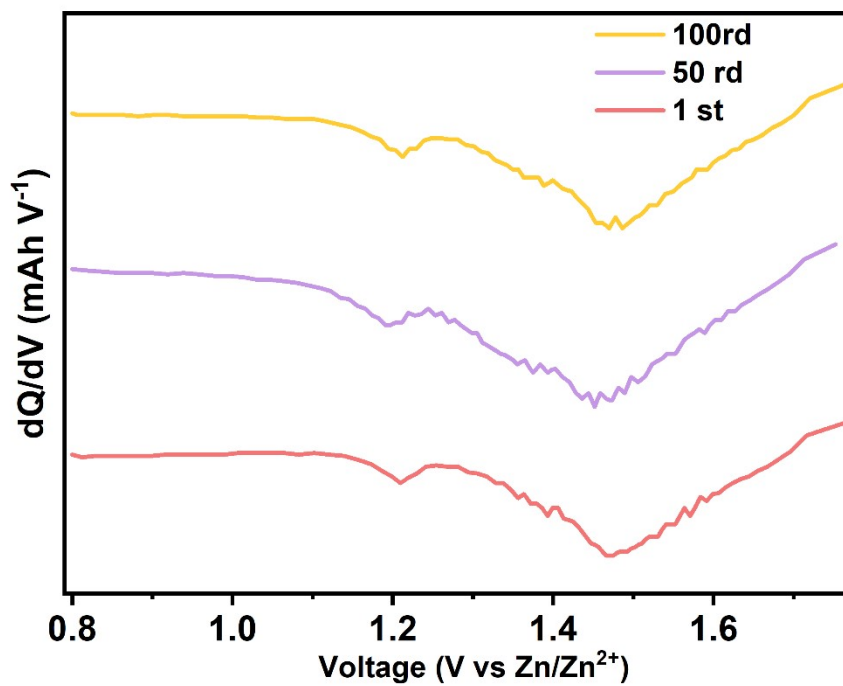

Fig. S14.  $dQ/dV$  plots of  $\delta\text{-MnO}_2/\text{rGO}$  electrode.

Table S4. Summary table of contributions of H<sup>+</sup> and Zn<sup>2+</sup>.

| Cycle   | Q <sub>Zn<sup>2+</sup></sub><br>(mAh) | Q <sub>H<sup>+</sup></sub><br>(mAh) | Zn <sup>2+</sup> ratio<br>(%) | H <sup>+</sup> ratio<br>(%) |
|---------|---------------------------------------|-------------------------------------|-------------------------------|-----------------------------|
| 1 st    | 0.04                                  | 0.24                                | 14.28                         | 85.72                       |
| 50 th   | 0.06                                  | 0.30                                | 16.67                         | 83.33                       |
| 100 th  | 0.05                                  | 0.26                                | 16.13                         | 83.87                       |
| Average |                                       |                                     | 15.69                         | 84.31                       |

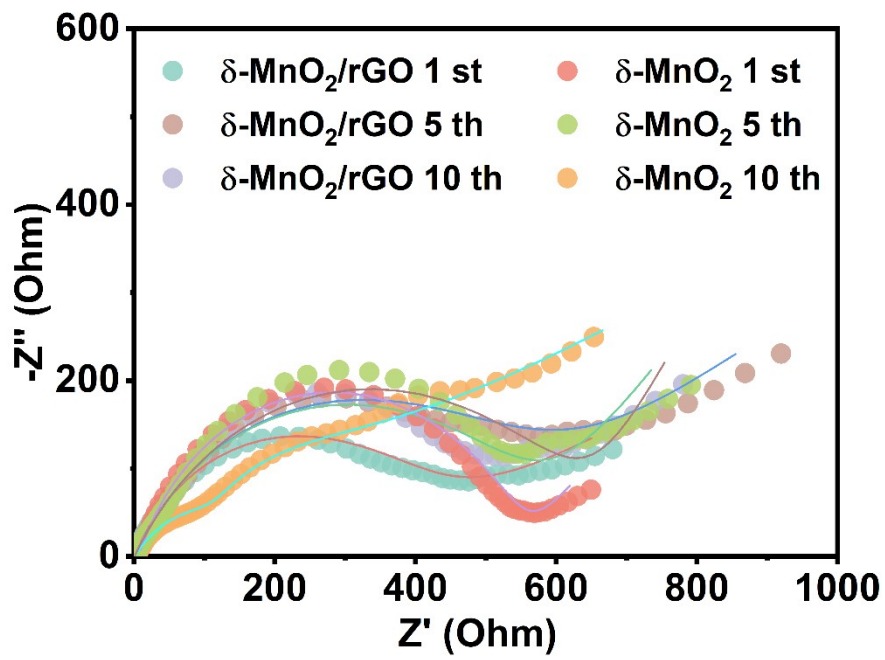

Fig. S15. EIS spectra of  $\delta\text{-MnO}_2/\text{rGO}$  and  $\delta\text{-MnO}_2$  electrodes at 1<sup>st</sup>–10<sup>th</sup> cycles.

Table S5. EIS analysis results of  $\delta$ -MnO<sub>2</sub> and  $\delta$ -MnO<sub>2</sub>/rGO.

| Rct   | $\delta$ -MnO <sub>2</sub> | $\delta$ -MnO <sub>2</sub> /rGO |
|-------|----------------------------|---------------------------------|
| 1 st  | 543.33                     | 360.96                          |
| 5 th  | 655.4                      | 530.38                          |
| 10 th | 1356.3                     | 574.31                          |

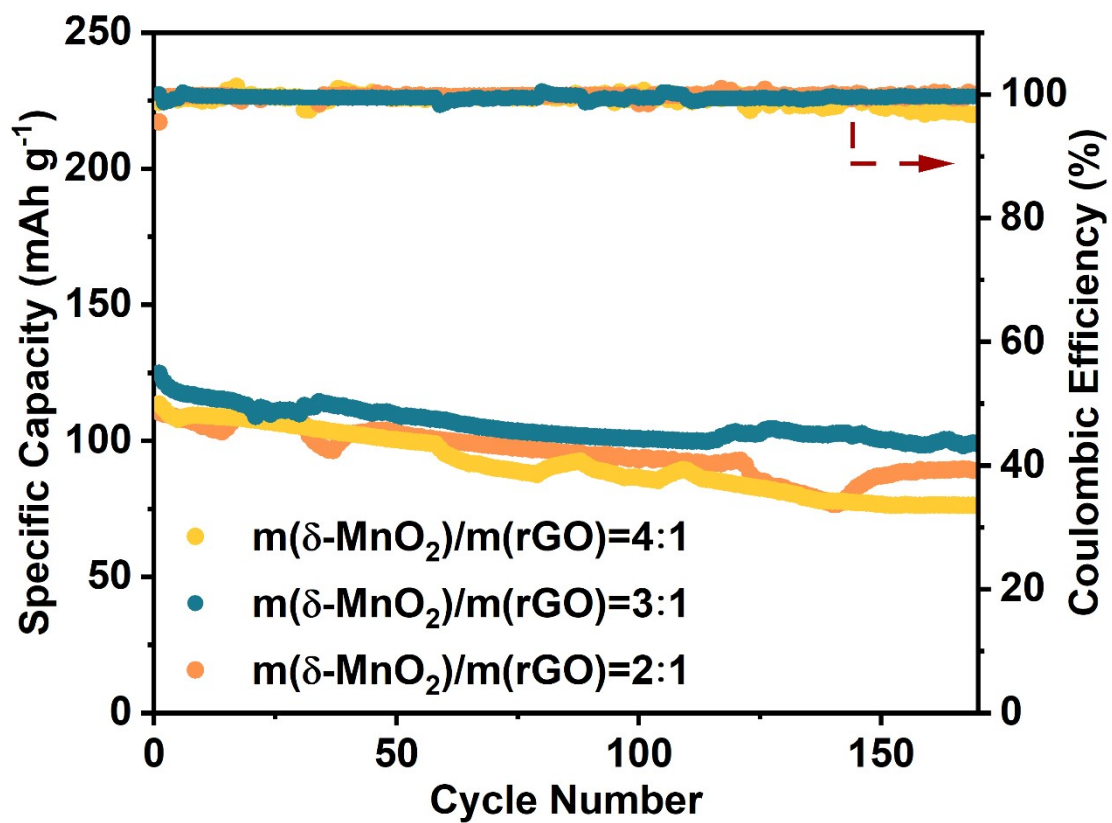

Fig. S16. Cycle performance of the  $\delta$ -MnO<sub>2</sub>/rGO electrodes with different mass ratios at current density of 1 A g<sup>-1</sup>.

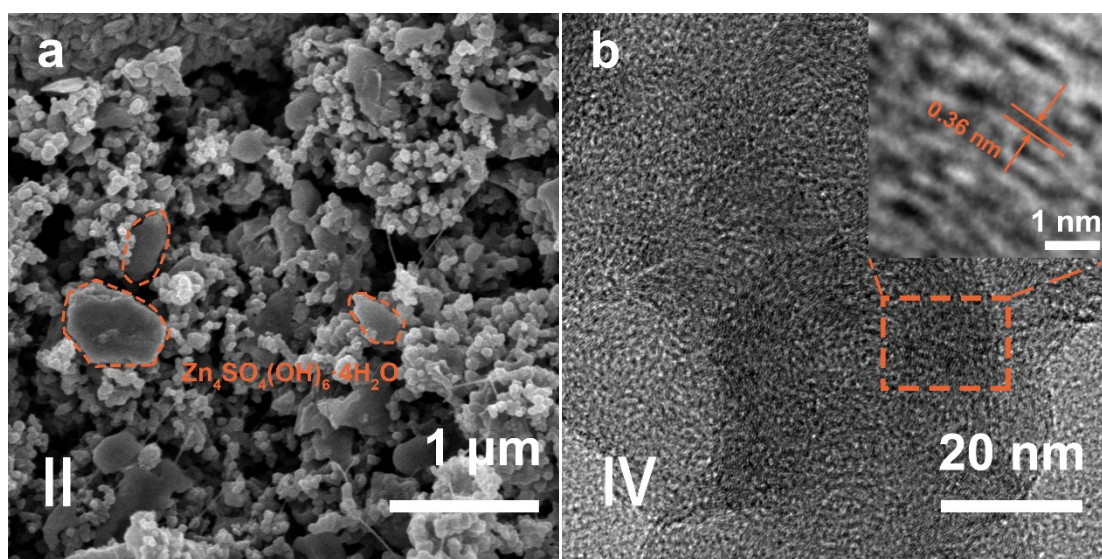

Fig. S17. (a) SEM image of II. (b) TEM image of IV.

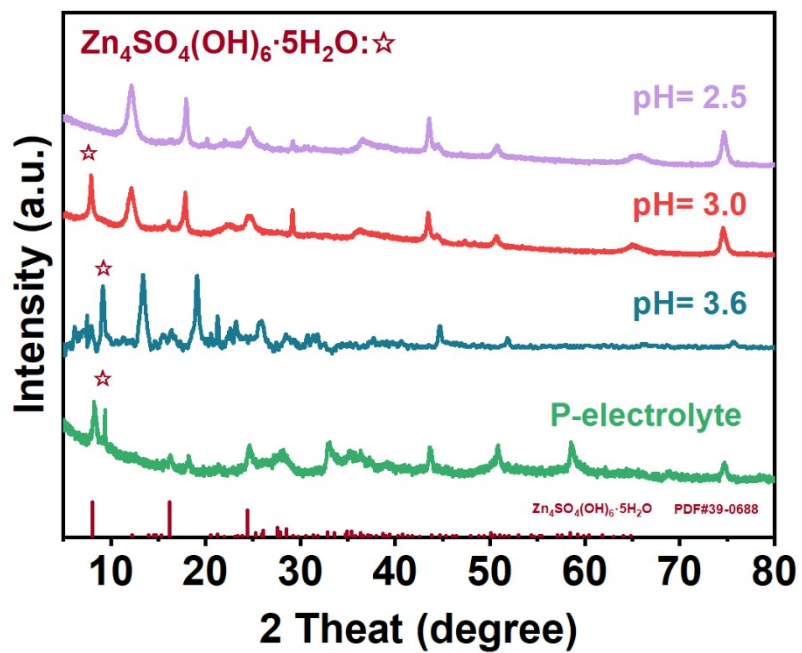

Fig. S18. XRD patterns after discharging to 0.8 V in electrolytes with different pH values.
